# Supplementary material for: The Level of Health Literacy of Seniors Living in Eastern Region of Poland. Preliminary Study
Source: PubMed Central journal article supplement (PMC7551014; doi:10.3390/healthcare8030277), 2020-08-17
Supplement: healthcare-08-00277-s001.pdf [file healthcare-08-00277-s001.pdf]

**Supplementary materials for the study: *The level of health literacy of seniors as measured by the HLS-EU 47 tool***

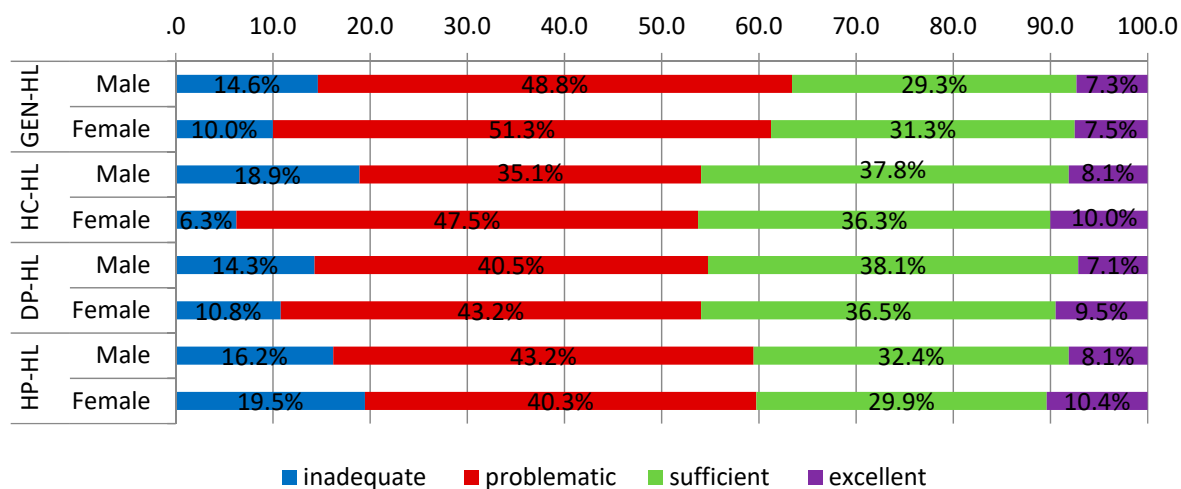

**Figure S1.** Percentages of HL Indices Levels Thresholds by gender.

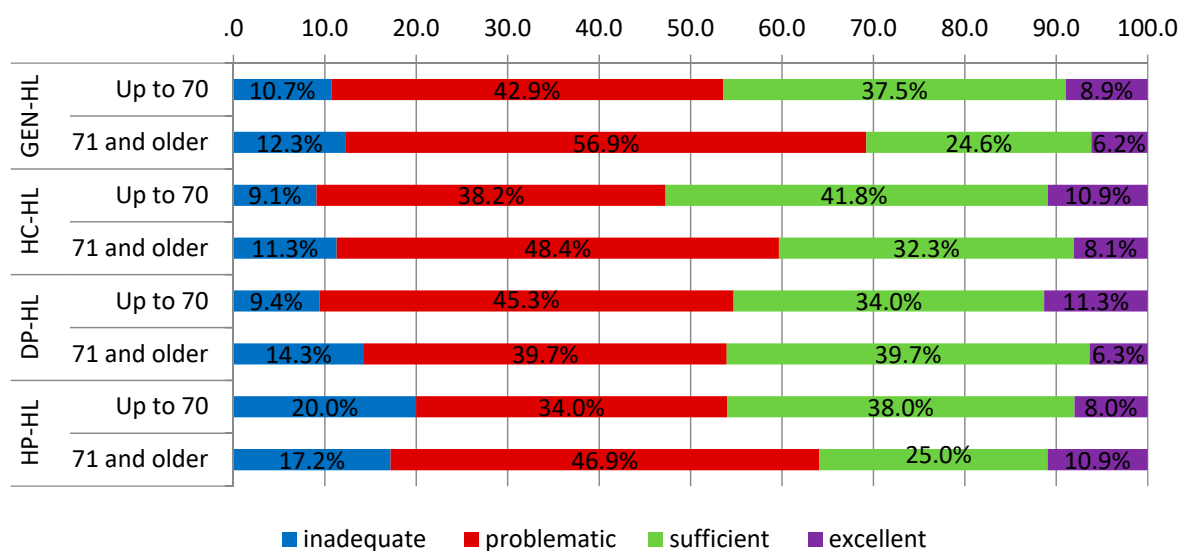

**Figure S2.** Percentages of HL Indices Levels Thresholds by age.

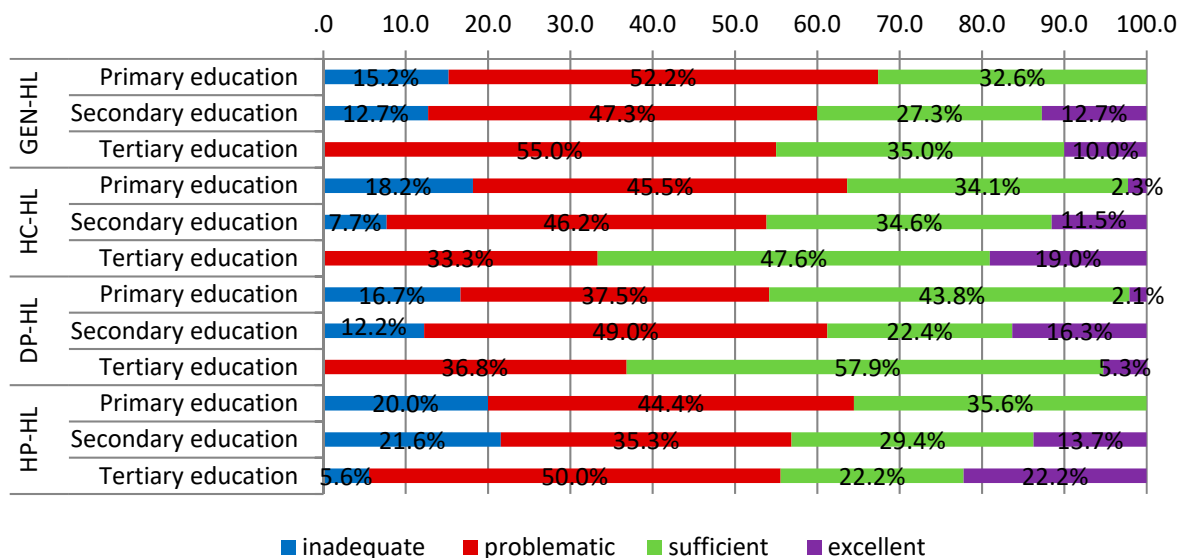

Figure S3. Percentages of HL Indices Levels Thresholds by education.

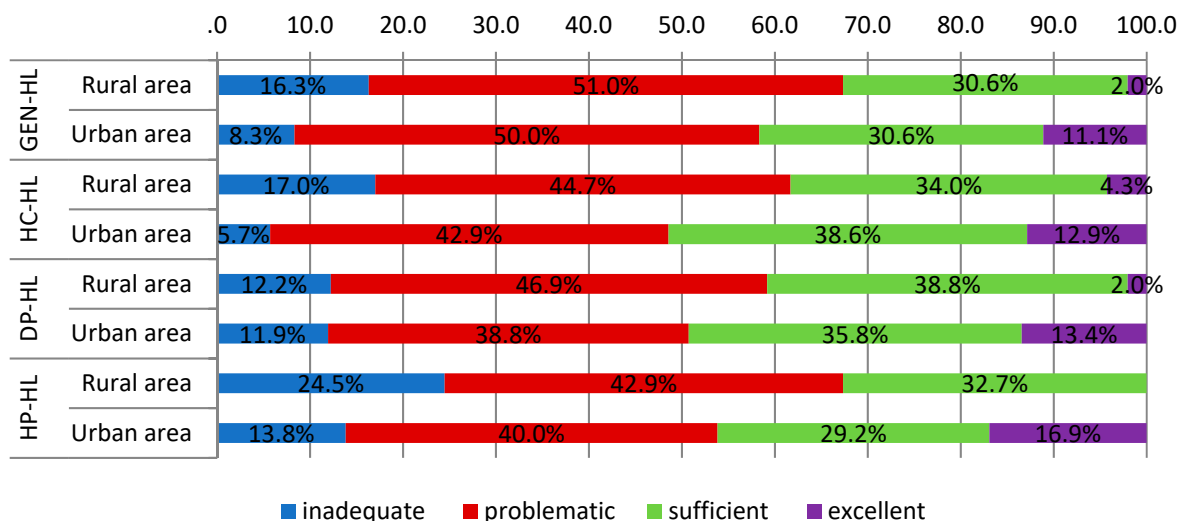

Figure S4. Percentages of HL Indices Levels Thresholds by place of living.

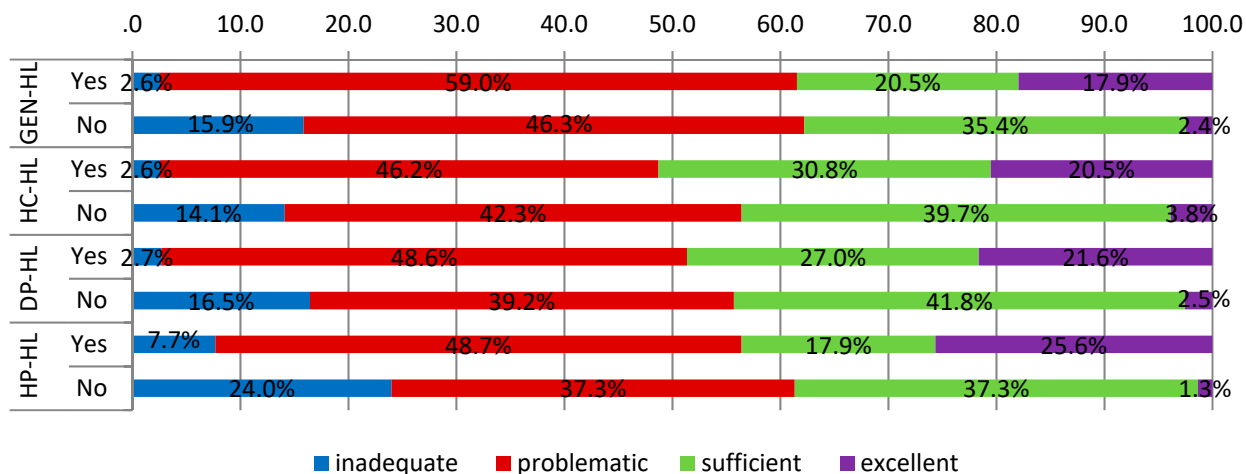

**Figure S5.** Percentages of HL Indices Levels Thresholds by participation in activities run by Daily Center for the Elderly or other organizations/institutions.

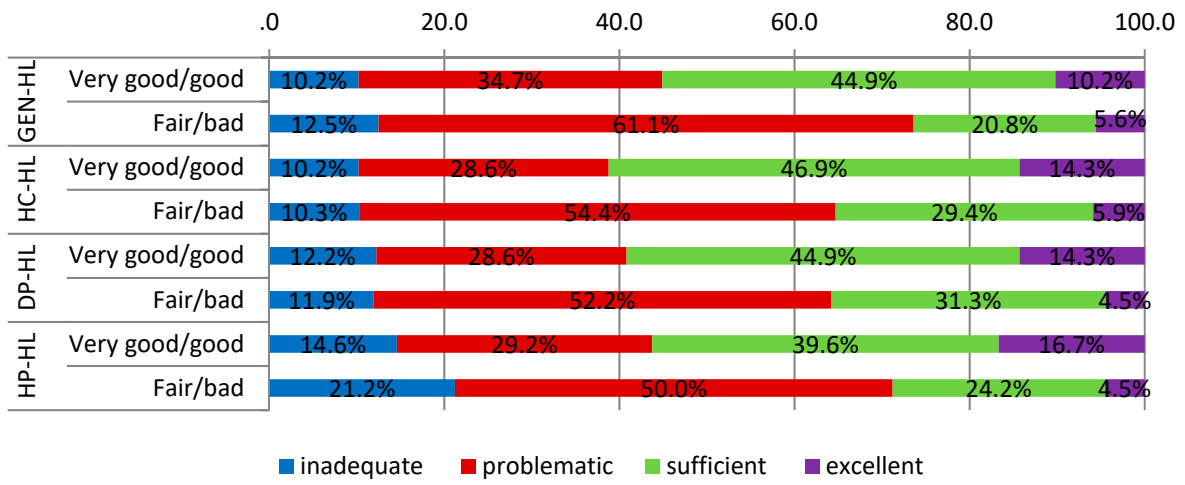

**Figure S6.** Percentages of HL Indices Levels Thresholds by Self-assessment of health condition.
